# Supplementary material for: EGFR Mutations and ALK Rearrangements Are Associated with Low Response Rates to PD-1 Pathway Blockade in Non–Small Cell Lung Cancer: A Retrospective Analysis
Source: Oxford University Press journal article supplement (doi:10.1158/1078-0432.ccr-15-3101), 2016-05-25
Supplement: 10780432ccr153101-sup-159925_1_supp_3432979_q52n7q.docx [file 10780432ccr153101-sup-159925_1_supp_3432979_q52n7q.docx]

**Table S1. Clinicopathologic Features of EGFR-Mutant and ALK-Positive Patients Included in PD-L1 Expression Analysis**

| Characteristic | EGFR  (*N*=68) | ALK  (*N*=27) |
| --- | --- | --- |
| Age at Diagnosis  Median  Range | 58  39-82 | 55  22-78 |
| Sex – no. (%)  Male  Female | 22 (32)  46 (68) | 13 (48)  14 (52) |
| Ethnicity – no. (%)a  Caucasian  Asian  Other | 54 (82)  11 (17)  1 (2) | 19 (70)  7 (26)  1 (4) |
| Smoking History – no. (%)b  Never  Light (≤10 pack years)  Heavy (>10 pack years) | 42 (63)  12 (18)  13 (19) | 19 (70)  5 (19)  3 (11) |
| Histology – no. (%)  Adenocarcinoma  Squamous | 67 (99)  1 (1) | 26 (96)  1 (4) |
| Stage at Diagnosis – no. (%)  Stage I-II  Stage III-IV | 7 (10)  61 (90) | 2 (7)  25 (93) |
| Current Stage – no. (%)  Stage I-II  Stage III-IV | 0 (0)  68 (100) | 0 (0)  27 (100) |

a Not available in 2 patients

b Not available in 1 EGFR pt
